# Supplementary material
Source: PubMed Central journal article supplement (PMC1266207)
Supplement: 451-456-s2.pdf [file 451-456-s2.pdf]

## Supplementary information

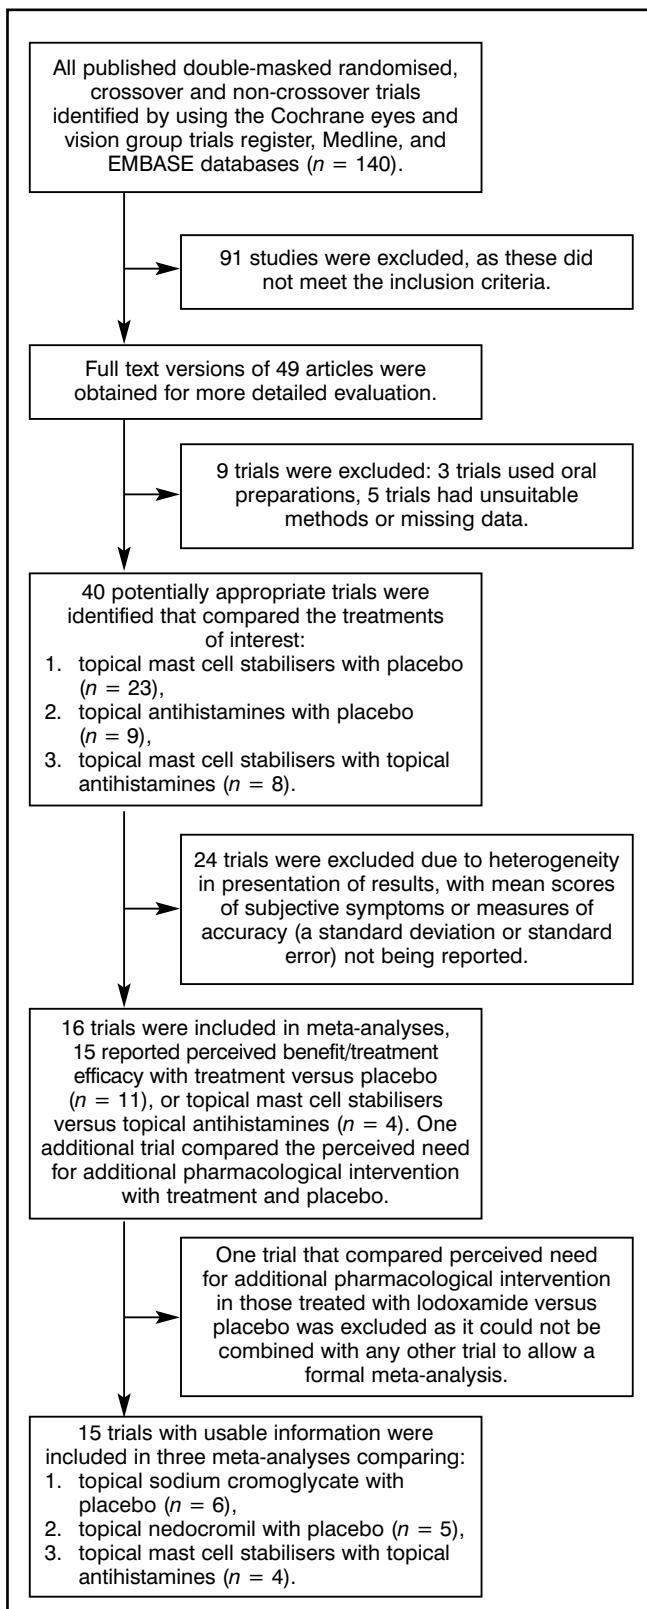

Supplementary figure 1. Flow diagram showing the number of trials included and excluded from the meta-analysis (QUOROM statement).
