# Supplementary material
Source: PubMed Central journal article supplement (PMC1266207)
Supplement: 451-456-s3.pdf [file 451-456-s3.pdf]

## Supplementary information

Supplementary table 1. Studies reporting the patient-perceived benefit of topical sodium cromoglycate versus placebo, included in the meta-analysis.

| Reference                          | Type of trial  | Setting                                                                | Sample age (years)<br>Mean (range) | Allergen, time of year                 | Patient inclusion criteria                                                                                              | Patient exclusion criteria                                                                                   | Active treatment                                        | Length of trial | Assessment of subjective symptoms           | Number that preferred placebo | Number that preferred active |
|------------------------------------|----------------|------------------------------------------------------------------------|------------------------------------|----------------------------------------|-------------------------------------------------------------------------------------------------------------------------|--------------------------------------------------------------------------------------------------------------|---------------------------------------------------------|-----------------|---------------------------------------------|-------------------------------|------------------------------|
| Greenbaum 1977 <sup>11</sup>       | RCT            | St Joseph's Hospital and McMaster University, Ontario, Canada          | 29 (14–52)                         | Ragweed, Aug 1976                      | Ragweed allergic conjunctivitis, symptomatic for 2 years, with allergic rhinitis, skin prick positive to ragweed pollen | Perennial symptoms or autumn seasonal symptoms excluded                                                      | 4% SCG                                                  | 1 month         | Interview and patient diary cards           | 8/14                          | 15/15                        |
| Hechanova 1984 <sup>12</sup>       | RCT            | Makati Medical Centre, Philippines                                     | 35 (5–71)                          | Not stated                             | Bilateral chronic allergic conjunctivitis                                                                               | Other ophthalmic pathology, contact lens wearers, topical or systemic steroids, systemic antihistamines      | 4% SCG                                                  | 4 weeks         | Clinician interview and patient diary cards | 4/19                          | 17/19                        |
| Lindsay 1979 <sup>18</sup>         | RCT            | Bangor Hospital, Northern Ireland, UK                                  | All ages                           | Grass pollen, Apr–Sep (mostly May–Jul) | On a 'hayfever register', history of eye symptoms and hayfever rhinitis, positive skin test to grass pollens            | Other eye diseases, contact lens wearers, topical or systemic steroids                                       | 2% SCG, 0.01% benzalkonium chloride, 0.4% phenylethanol | 4 weeks         | Patient diary cards                         | 12/33                         | 18/20                        |
| Nizami 1981 <sup>19</sup>          | Cross-over RCT | Private patients, Toronto, Canada                                      | 28                                 | Ragweed, Aug 1980                      | Eye symptoms and allergic rhinitis for 2 years, skin prick positive to ragweed pollen                                   | Those with perennial symptoms or on other influential medications excluded                                   | 2% SCG                                                  | 1 week          | Personal interview                          | 2/26                          | 22/26                        |
| Ruggieri 1987 <sup>15</sup>        | RCT            | Istituto di Oftalmologia, University of Rome, Italy                    | 19 (6–40)                          | Feb 1983– Apr 1984                     | Active bilateral VKC or conjunctivitis owing to a seasonal allergen                                                     | Other eye disease, purulent conjunctivitis, contact lens wearers, systemic corticosteroids or antihistamines | 4% SCG ointment                                         | 4 weeks         | Clinician interview and patient diary cards | 1/14                          | 13/15                        |
| van Bijsterveld 1984 <sup>17</sup> | Cross-over RCT | Department of Ophthalmology, Utrecht State University, The Netherlands | 38.6 (9–73)                        | Not stated                             | Diagnosis of chronic conjunctivitis not owing to infection or trauma                                                    | Not stated                                                                                                   | Topical SCG                                             | 4 weeks         | Patient symptoms recorded at each exam      | 15/58                         | 23/57                        |

RCT = randomised controlled trial; SCG = sodium cromoglycate, VKC = vernal keratoconjunctivitis.
