# Supplementary material
Source: PubMed Central journal article supplement (PMC1266207)
Supplement: 451-456-s4.pdf [file 451-456-s4.pdf]

## Supplementary information

Supplementary table 2. Studies reporting the patient-perceived benefit of topical nedocromil sodium versus placebo, included in the meta-analysis.

| Reference                     | Setting                        | Sample age (years)<br>Mean (range) | Allergen, time of year                 | Patient inclusion criteria                                                                                                                     | Patient exclusion criteria                                                                                                                                                                                                                                  | Active treatment                                                                                                 | Length of trial | Assessment of subjective symptoms                    | Number that preferred placebo | Number that preferred active |
|-------------------------------|--------------------------------|------------------------------------|----------------------------------------|------------------------------------------------------------------------------------------------------------------------------------------------|-------------------------------------------------------------------------------------------------------------------------------------------------------------------------------------------------------------------------------------------------------------|------------------------------------------------------------------------------------------------------------------|-----------------|------------------------------------------------------|-------------------------------|------------------------------|
| Blumenthal 1992 <sup>20</sup> | Multi-centre study, US         | 32 (12–62)                         | Ragweed, Aug 1976                      | Previous seasonal allergic conjunctivitis, skin test reaction to ragweed                                                                       | Childbearing age, not using contraception, absent or minimal symptoms during previous ragweed season, not using medication for seasonal allergic conjunctivitis, evidence of perennial allergic conjunctivitis, other ocular disease                        | Nedocromil sodium 2%, benzalkonium chloride 0.01%, disodium edetate 0.05%, sodium chloride 0.55%, purified water | 8 weeks         | Patient diary cards                                  | 26/71                         | 36/69                        |
| Leino 1990 <sup>21</sup>      | 5 centres in Finland           | 22 (7–60)                          | Not stated                             | History of seasonal allergic conjunctivitis to birch pollen for the past two seasons. Patients with concomitant rhinitis included              | Additional eye diseases, contact lens wearers, systemic or topical corticosteroids or systemic antihistamines, hyposensitization in the last year. Pregnant or lactating women                                                                              | Nedocromil sodium 2%, benzalkonium chloride 0.01%, disodium edetate 0.05%, sodium chloride 0.55%, purified water | 4–6 weeks       | Patient daily diary cards                            | 22/62 <sup>a</sup>            | 37/64 <sup>a</sup>           |
| Melamed 1994 <sup>22</sup>    | Multi-centre study, US         | 32 (13–60)                         | Grass pollen, Apr–Sep (mostly May–Jul) | History of seasonal allergic conjunctivitis for the past two seasons, skin test reaction to ragweed, patients receiving immunotherapy included | Women of childbearing age not using contraception, asymptomatic or mildly symptomatic during the previous ragweed pollen season, not requiring medications to control their allergic conjunctivitis, perennial conjunctivitis, other conjunctival pathology | Nedocromil sodium 2%, benzalkonium chloride 0.01%, disodium edetate 0.05%, sodium chloride 0.55%, purified water | 9 weeks         | Patient daily diary cards                            | 14/38                         | 26/42                        |
| Moller 1994 <sup>23</sup>     | 4 paediatric clinics in Sweden | 12 (6–16)                          | Ragweed, Aug 1980                      | History of seasonal allergic conjunctivitis for the past two seasons to birch pollen, confirmed by RAST test and/or a positive skin-prick test | Other eye disorders, contact lens wearers, known sensitivity to constituents of active or placebo drops, use of other ophthalmic medications, systemic corticosteroids or antihistamines, hyposensitization treatment during the last year                  | Nedocromil sodium 2%, benzalkonium chloride 0.01%, disodium edetate 0.05%, sodium chloride 0.55%                 | 4 weeks         | Daily diary cards completed by the patient or parent | 49/70                         | 52/76                        |
| Stockwell 1994 <sup>24</sup>  | Bristol Eye Hospital, UK       | >6                                 | Feb 1983–Apr 1984                      | Symptomatic hay fever conjunctivitis                                                                                                           | Additional eye disease, contact lens wearers, systemic steroids, pregnant or lactating women                                                                                                                                                                | Nedocromil sodium 2%, benzalkonium chloride 0.01%, edetate sodium (EDTA) 0.05%,                                  | 4 weeks         | Interview and patient diary cards                    | 19/32                         | 24/32                        |

<sup>a</sup>Intention-to-treat analysis. RAST = radioallergosorbent test.
