# Supplementary material
Source: PubMed Central journal article supplement (PMC1266207)
Supplement: 451-456-s6.pdf [file 451-456-s6.pdf]

## Supplementary information

Supplementary table 4. Studies reporting perceived good or excellent treatment efficacy with topical mast cell stabilisers versus antihistamines, included in the meta-analysis.

| Reference                    | Setting                                             | Sample age (years)<br>Median (range) | Time of year     | Patient inclusion criteria                                                                                                                                                                                                    | Patient exclusion criteria                                                                                                                                                                                                                                                                                  | Active treatments                                              | Length of trial | Assessment of subjective symptoms                                    | No. with good treatment efficacy with MCS | Number with good treatment efficacy with anti-histamines |
|------------------------------|-----------------------------------------------------|--------------------------------------|------------------|-------------------------------------------------------------------------------------------------------------------------------------------------------------------------------------------------------------------------------|-------------------------------------------------------------------------------------------------------------------------------------------------------------------------------------------------------------------------------------------------------------------------------------------------------------|----------------------------------------------------------------|-----------------|----------------------------------------------------------------------|-------------------------------------------|----------------------------------------------------------|
| Frostad 1993 <sup>33</sup>   | Allergologisk Poliklinikk, Oslo, Norway             | 30 (19–51)                           | Hay fever season | History of conjunctivitis owing to birch and grass pollen, positive skin prick and RAST test to birch and grass pollen in the last year, over 18 years of age,                                                                | Conjunctivitis owing to other causes, participation in a hyposensitization programme, concurrent disease or therapy likely to complicate treatment efficacy, treatment with investigational drug 1 month prior to trial, contact lens wearer, poor compliance, pregnant or nursing women                    | SCG 20mg/dl (qds), levocabastine 0.5 mg/dl (bd)                | 4 months        | Patients daily assessment, efficacy assessed at the end of the trial | 25/34 <sup>a</sup>                        | 32/37 <sup>a</sup>                                       |
| Vermeulen 1994 <sup>35</sup> | Multicentre, South Africa                           | (6–15)                               | Not stated       | 1 year history of seasonal allergic rhinoconjunctivitis, skin prick and RAST test positive                                                                                                                                    | Medications that could interfere with evaluation of the study drugs (oral antihistamines, vasoconstrictors, corticosteroids)<br>Not stated                                                                                                                                                                  | SCG 2% (qds), levocabastine 0.05% (bd), both with nasal spray  | 4 weeks         | Patients daily assessment, investigators global evaluation           | 34/57 <sup>a</sup>                        | 38/53 <sup>a</sup>                                       |
| Wihl 1991 <sup>36</sup>      | 3-centre study in Malmö, Hässleholm, Örebro, Sweden | 25 (17–52)                           | Apr 1989         | History of seasonal allergic conjunctivitis during the tree and grass pollen seasons, for at least 1 year, positive skin prick and RAST test to birch and thimothy grass allergens, current allergic rhinitis, aged >15 years | Not stated                                                                                                                                                                                                                                                                                                  | SCG (qds), levocabastine (bd)                                  | 10 weeks        | Patient daily diary cards                                            | 26/29                                     | 29/32                                                    |
| Richard 1998 <sup>37</sup>   | 7-centre study, France                              | Mean = 31 (6–67)                     | Not stated       | History of allergic conjunctivitis and symptomatic of for at least 24 hours, positive skin prick or RAST test, a personal or family history of allergy                                                                        | Hypersensitivity to any constituents of study eyedrops, other conjunctivitis, medications (including topical ocular preparations, corticoids, antihistamines, nasal sodium cromoglycate, local vasoconstrictors), which could influence the results of the study (unless washed-out). Contact lens wearers, | Lodoxamide 0.1% (qds), levocabastine 0.05% (bd) + vehicle (bd) | 14 days         | Patient symptoms assessed by investigator at each visit              | 30/46                                     | 28/47                                                    |

**Supplementary information**

monocular patients, pregnant  
or lactating women.

---

<sup>a</sup>Intention-to-treat analysis. SCG = sodium cromoglycate; MCS = mast cell stabiliser; RAST = radioallergosorbent test; qds = four times daily, bd = twice daily.
